# Supplementary material for: Bi2S3nanorods grown on multiwalled carbon nanotubes as highly active catalysts for CO2electroreduction to formate
Source: Royal Society of Chemistry journal article supplement (doi:10.1039/d2cp05761a), 2023-01-01
Supplement: d2cp05761a1.pdf [file d2cp05761a1.pdf]

Electronic Supplementary Material (ESI) for Physical Chemistry  
Chemical Physics.

## Supporting Information for

# **Bi<sub>2</sub>S<sub>3</sub> Nanorods Grown on Multiwalled Carbon Nanotubes as Highly Active Catalysts for CO<sub>2</sub> Electroreduction to Formate**

Fangfang Yang<sup>b</sup>, Zilai Xie<sup>c</sup>, Xuke Huang<sup>d</sup>, Xiangyang Yin<sup>b</sup>, Weifeng Zhang<sup>b</sup>,  
Yongkui Huang<sup>e</sup>, Daijun Zhang<sup>a,b\*</sup>.

State Key Laboratory of Coal Mine Disaster Dynamics and Control, Chongqing University,  
Chongqing 400044, China.

Department of Environmental Science, Chongqing University, Chongqing 400044, China. E-  
mail: dzhang@cqu.edu.cn; Tel: 86-023-65105875.

## Experimental sections

### Electrocatalytic CO<sub>2</sub> Reduction

To prepare the working electrode, 3 mg materials and 1 mg ketjen black were suspended in a mixture of ethanol (360  $\mu\text{L}$ , 95%), Nafion solution (40  $\mu\text{L}$ , 5%), and ultrasonic treatment for 1 h. Then, 16  $\mu\text{L}$  ink was dropped on the surface of the glass carbon electrode with an area of 0.196  $\text{cm}^2$  and dried at room temperature. Typically, the linear sweep voltammetry (LSV) curves were produced at a scan rate of 10  $\text{mV s}^{-1}$ . All of the potentials were converted to the reversible hydrogen electrode  $E(\text{vs.RHE}) (\text{V}) = E(\text{Ag/AgCl}) + 0.2046 + 0.0591\text{pH}$  and corrected by  $iR$  drop compensation. The chronoamperometry tests were conducted at different potentials for 1 h. The electrochemical surface area (ECSA) was examined from 0.09 V to 0.19 V by cyclic voltammetry (CV). Electrochemical impedance spectroscopy (EIS) were measured from 100 000 Hz to 0.1 Hz at -0.76 V vs. RHE. All the measurements were conducted under ambient pressure at room temperature. The Faradaic efficiency (FE) towards formate ( $FE_{\text{HCOO}^-}$ ) is calculated by the equation:

$$FE = \frac{2nF}{Q} \times 100\% \quad (1)$$

Where 2 is the number electron transferred for  $\text{HCOO}^-$ ,  $\text{H}_2$  or  $\text{CO}$ ,  $n$  is the mole of the product  $\text{HCOO}^-$ ,  $F$  is Faraday constant (96,485), and  $Q$  is total electric charge integrated by  $i-t$  curve.

The Faradaic efficiency for the products of  $\text{CO}$  and  $\text{H}_2$  ( $FE_{\text{CO}}$  or  $FE_{\text{H}_2}$ ) is calculated by the equation:

$$FE_{\text{CO/H}_2} = \frac{10^{-3} m v\% F G}{60 R T i} P \quad (2)$$

Where  $v\%$  is the volume concentration of  $\text{CO}/\text{H}_2$  in the collected gases from the headspace of the cell,  $G$  is flow rate of  $\text{CO}_2$  bubbled into the cell ( $\text{mL min}^{-1}$ ),  $m$  is the number of electrons transferred for the products  $\text{CO}$  and  $\text{H}_2$  (here  $m=2$ ),  $i$  is the current (mA),  $P = 1.01 \times 10^5$  Pa,  $R = 8.314 \text{ J mol}^{-1} \text{ K}^{-1}$ ,  $T = 273.15$  K.

### Theoretical Calculations

The present first principle DFT calculations are performed by Vienna Ab initio Simulation Package (VASP)<sup>1</sup> with the projector augmented wave (PAW) method<sup>2</sup>. The exchange-functional is treated using the generalized gradient approximation (GGA) of Perdew-Burke-Ernzerhof (PBE) functional.<sup>3</sup> The Spin-polarizations were carried out for all calculations. The energy cutoff for the plane wave basis expansion was set to 450 eV and the force on each atom less than 0.03 eV/Å was set for convergence criterion of geometry relaxation. The k-points in the Brillouin zone were sampled by a  $2 \times 2 \times 1$  grid. The self-consistent calculations apply a convergence energy

threshold of 10<sup>-5</sup> eV. The DFT-D3 method was employed to consider the van der Waals interaction.<sup>4</sup> A 15 Å vacuum was added along the z direction in order to avoid the interaction between periodic structures. The free energies of the CO<sub>2</sub>RR steps were calculated by the equation:<sup>5</sup>

$$\Delta G = \Delta E_{\text{DFT}} + \Delta E_{\text{ZPE}} - T \Delta S$$

where  $\Delta E_{\text{DFT}}$  is the DFT electronic energy difference of each step,  $\Delta E_{\text{ZPE}}$  and  $\Delta S$  are the correction of zero-point energy and the variation of entropy, respectively, which are obtained by vibration analysis, T is the temperature (T = 300K).

The CNTs model consists of 120 C atoms, and the Bi<sub>2</sub>S<sub>3</sub>-CNTs model loads a Bi<sub>2</sub>S<sub>3</sub> isolated atomic cluster based on the CNTs model to represent the interface relationship of the composite structure. The Bi<sub>2</sub>S<sub>3</sub> structure consists of 48 Bi atoms and 72 S atoms.

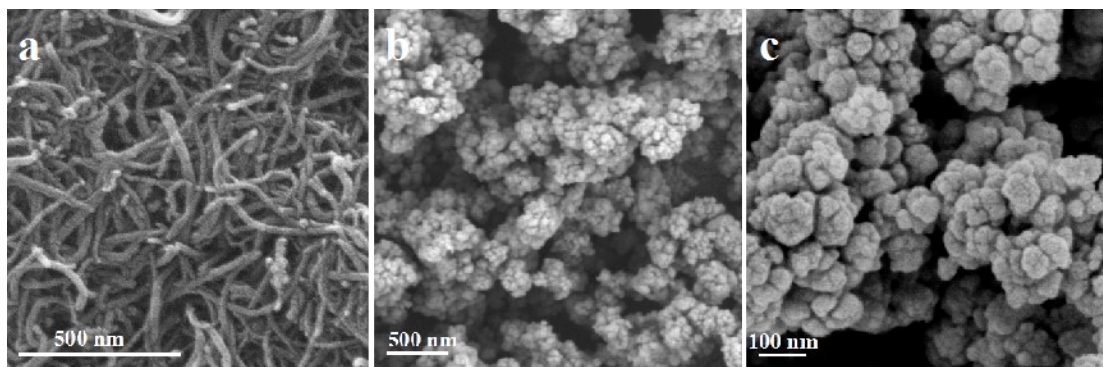

**Fig. S1.** SEM images of (a) CNTs, (b and c) pure  $\text{Bi}_2\text{S}_3$  materials, respectively.

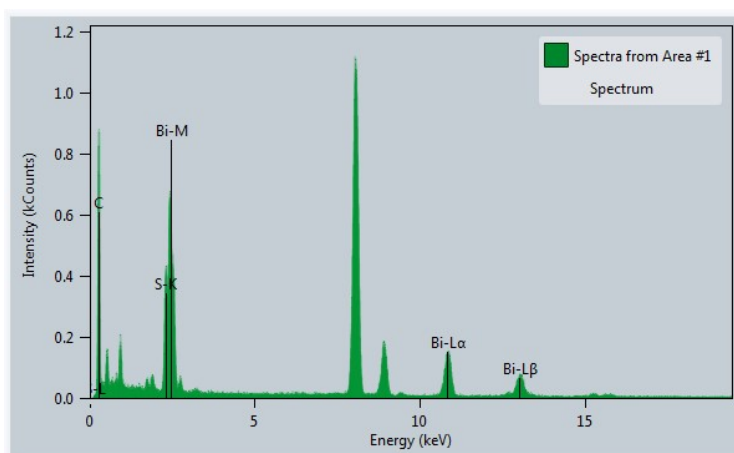

**Fig. S2.** EDS spectrum of  $\text{Bi}_2\text{S}_3/\text{CNTs}$  nanocomposite.

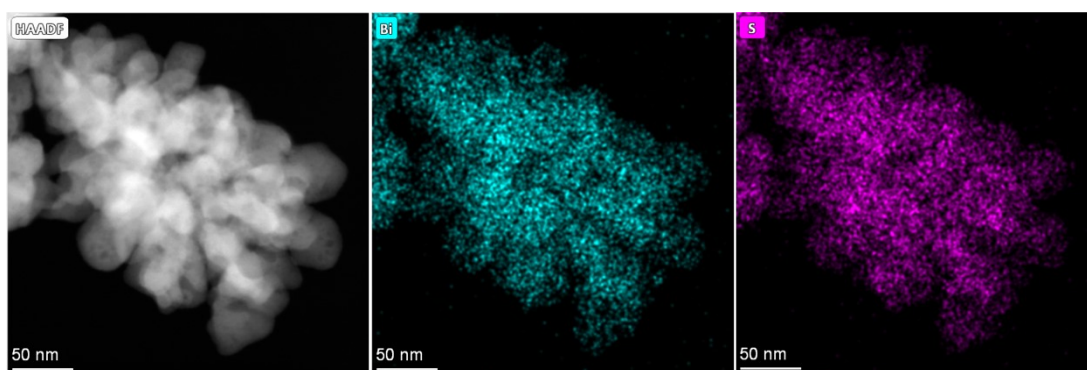

**Fig. S3.** TEM images and corresponding element mapping including Bi, S of  $\text{Bi}_2\text{S}_3$  material.

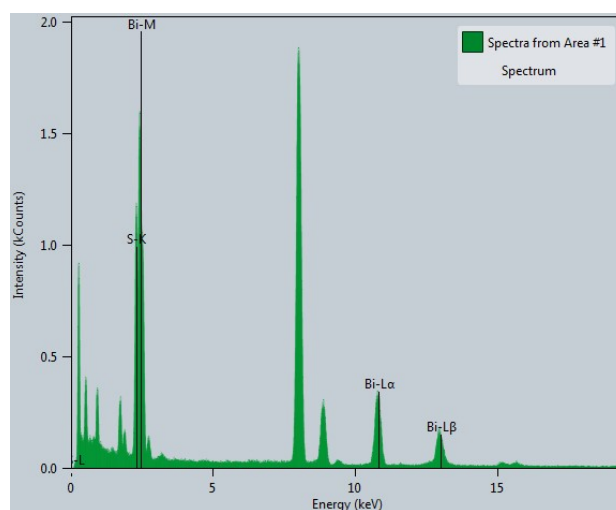

**Fig. S4.** EDS spectrum of pure  $\text{Bi}_2\text{S}_3$  material.

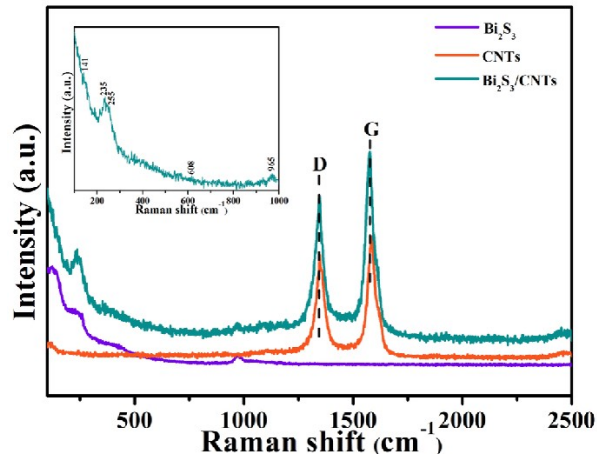

Fig. S5. Raman spectra of CNTs,  $\text{Bi}_2\text{S}_3$ ,  $\text{Bi}_2\text{S}_3/\text{CNTs}$  materials.

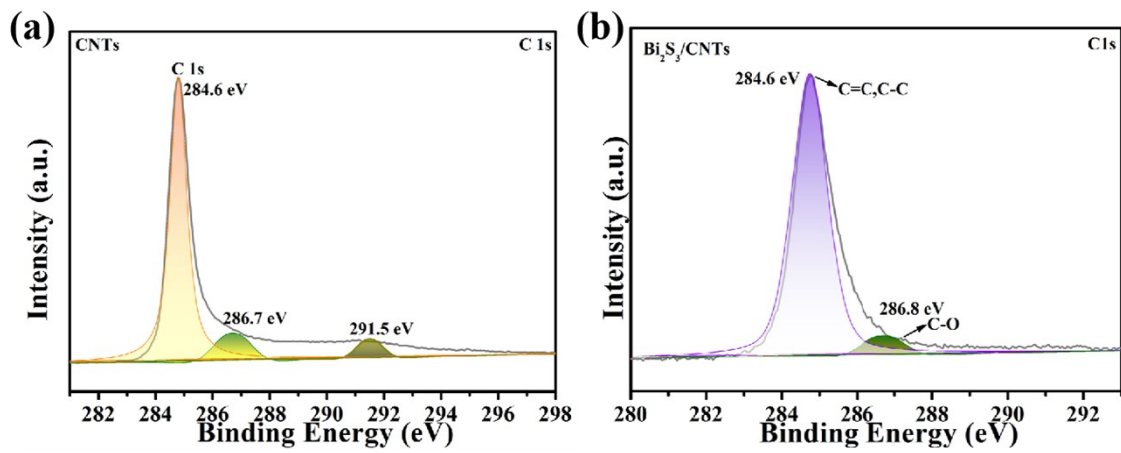

Fig. S6. X-ray photoelectron spectroscopy (XPS) survey of (a) CNTs and (b)  $\text{Bi}_2\text{S}_3/\text{CNTs}$  materials.

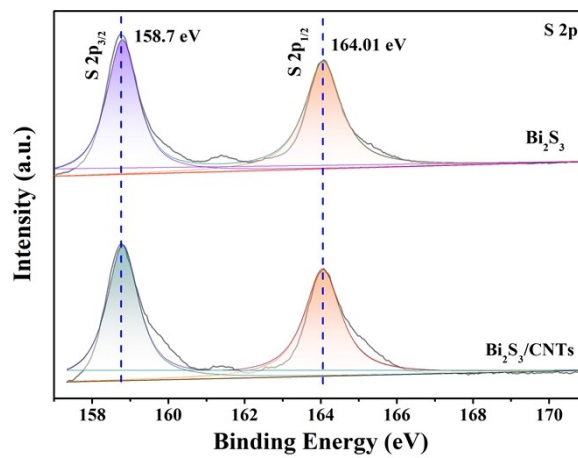

Fig. S7. S 2p spectra of  $\text{Bi}_2\text{S}_3$ , and  $\text{Bi}_2\text{S}_3/\text{CNTs}$  materials.

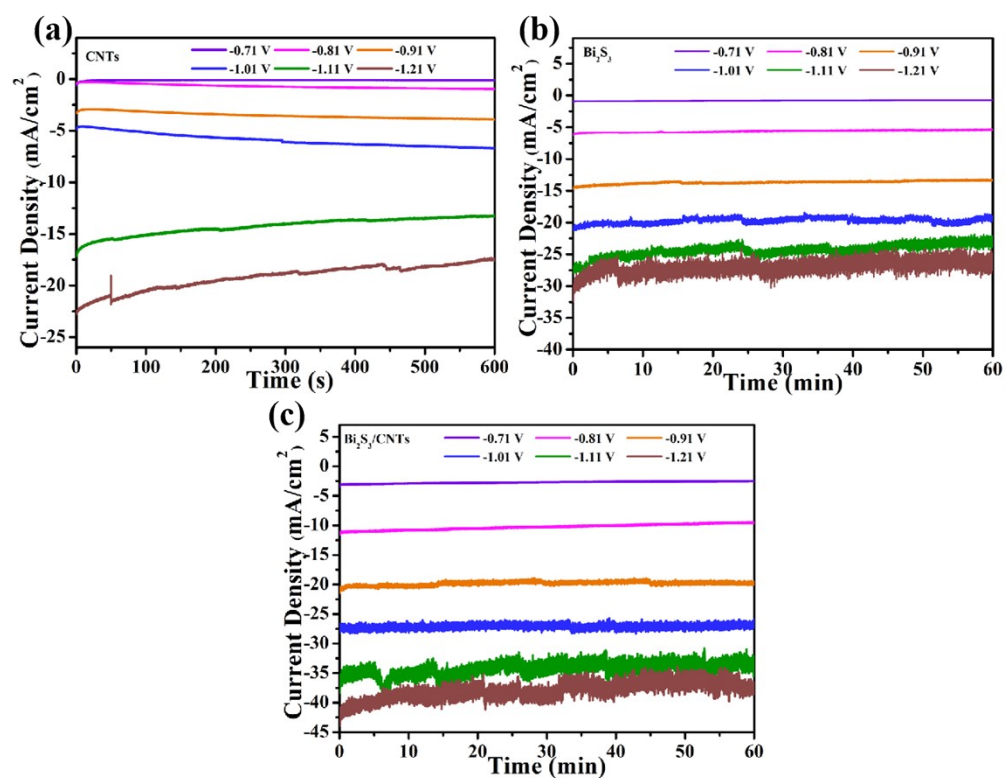

**Fig. S8.** Corresponding current density profile of the various catalysts at the selected potential for 60 min electrolysis: (a) CNTs, (b) Bi<sub>2</sub>S<sub>3</sub>, (c) Bi<sub>2</sub>S<sub>3</sub>/CNTs nanocomposite.

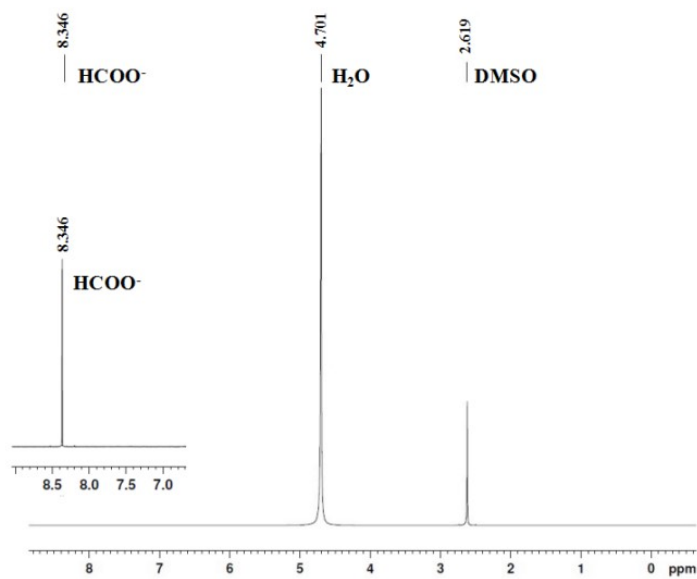

**Fig. S9.** The <sup>1</sup>H NMR spectra of KHCO<sub>3</sub> electrolyte after electrolysis test over Bi<sub>2</sub>S<sub>3</sub>/CNTs catalyst.

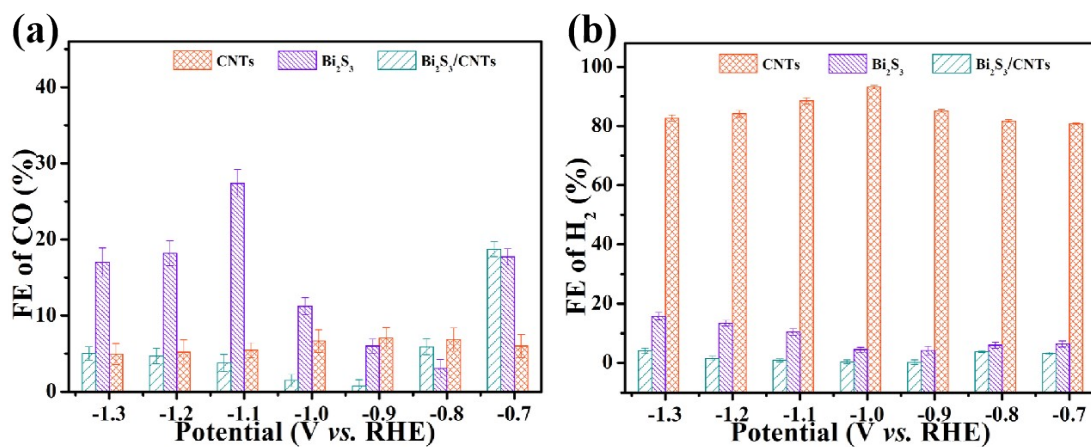

Fig. S10. FE of (a) CO and (b) H<sub>2</sub> of three catalysts at different potentials.

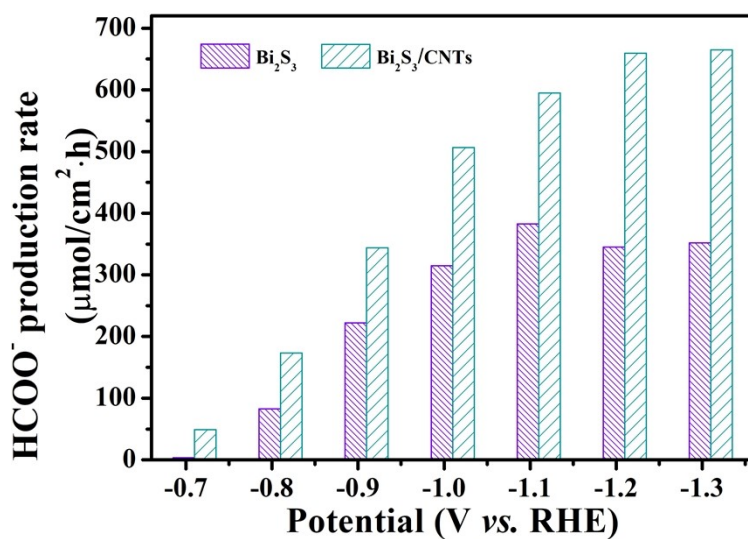

Fig. S11. HCOO<sup>-</sup> production rates of pure Bi<sub>2</sub>S<sub>3</sub> and Bi<sub>2</sub>S<sub>3</sub>/CNTs nanocomposite at various potential for 60 min.



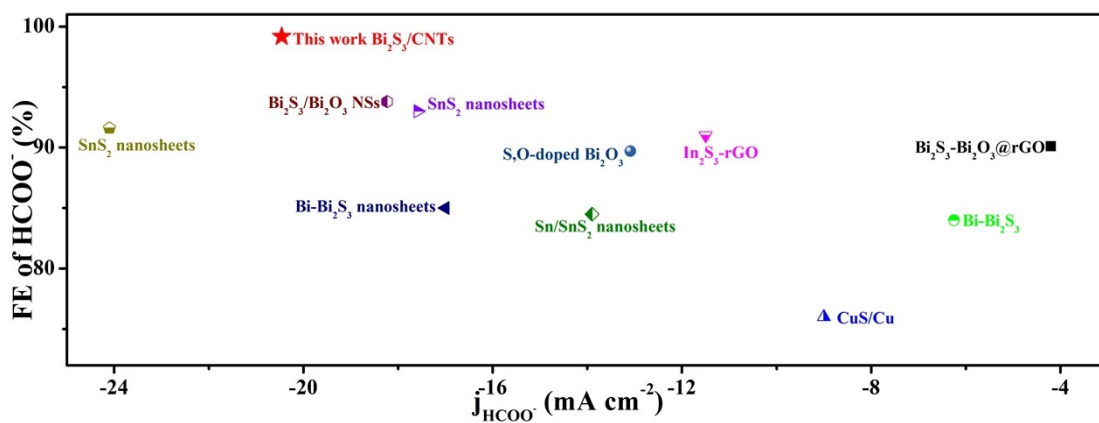

**Fig. S12.** Comparison of the electrocatalytic activity of our catalyst with other state-of-the-art catalysts for electrochemical reduction of  $\text{CO}_2$  to  $\text{HCOO}^-$ .

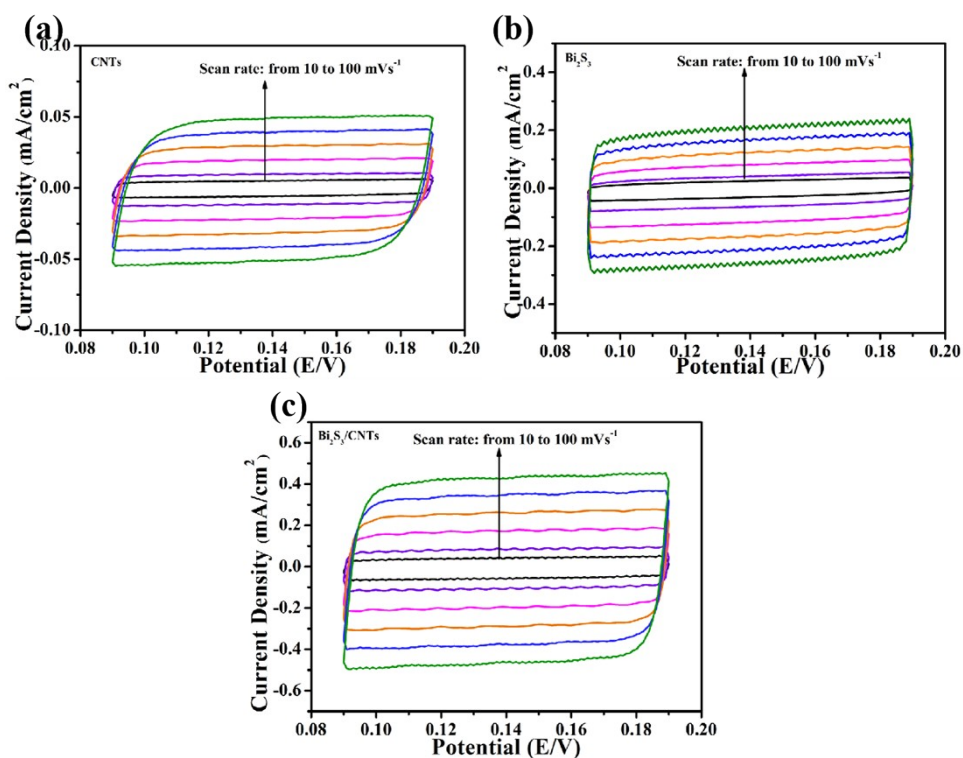

**Fig. S13.** CV curves at scan rates from 10 to 100  $\text{mV s}^{-1}$ .

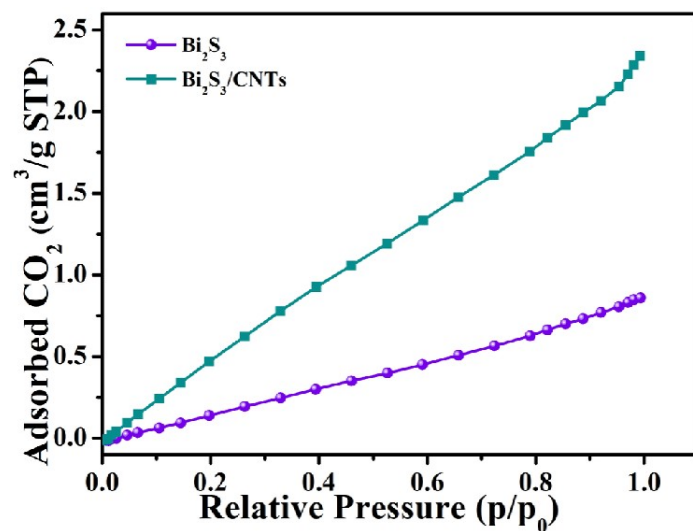

Fig. S14. CO<sub>2</sub> sorption isotherm of Bi<sub>2</sub>S<sub>3</sub> and Bi<sub>2</sub>S<sub>3</sub>/CNTs, respectively.

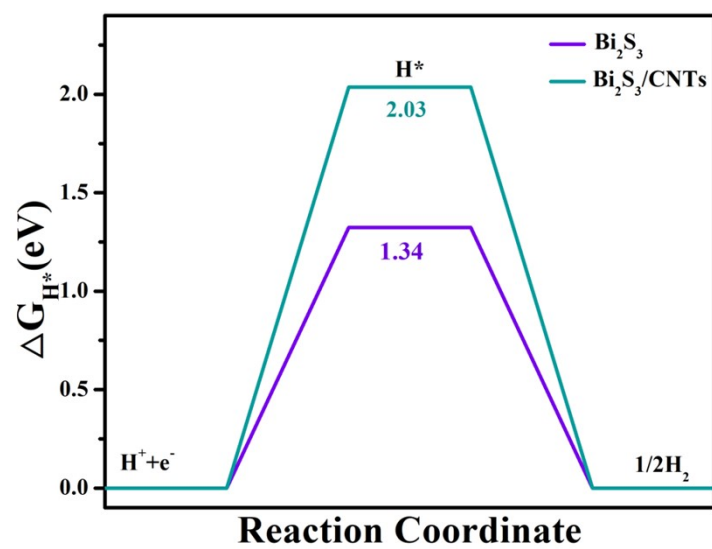

Fig. S15. Free-energy diagrams for H<sub>2</sub> formation on the Bi<sub>2</sub>S<sub>3</sub> and Bi<sub>2</sub>S<sub>3</sub>/CNTs catalysts.

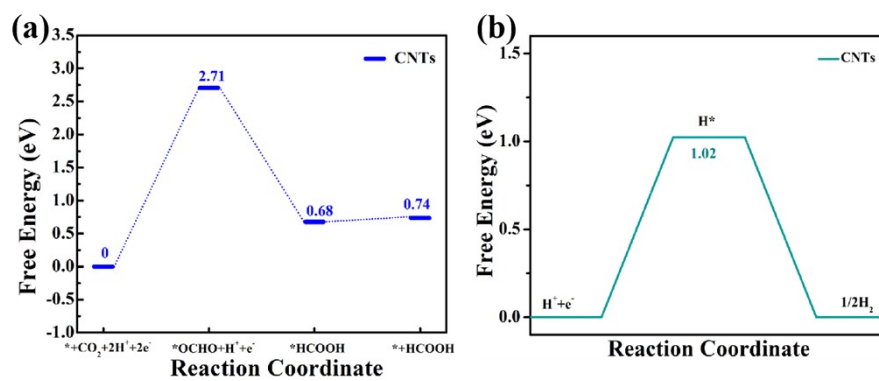

Fig. S16. Free-energy diagrams for formate and H<sub>2</sub> formation on the CNTs catalysts.

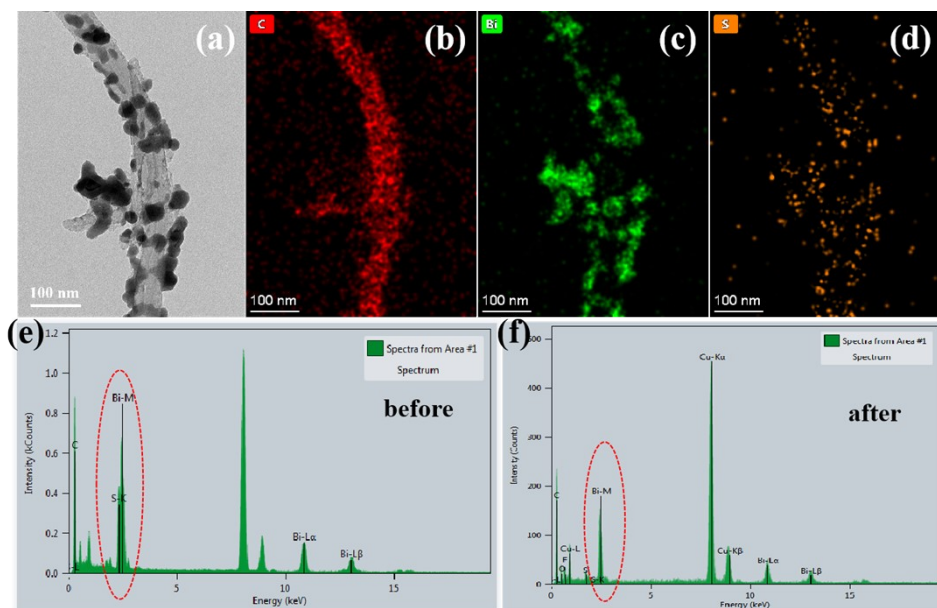

**Fig. S17.** (a) TEM, (b-d) elemental mapping of  $\text{Bi}_2\text{S}_3/\text{CNTs}$  after electrolysis, (e,f) EDS spectrum of  $\text{Bi}_2\text{S}_3/\text{CNTs}$  before and after electrolysis, respectively.

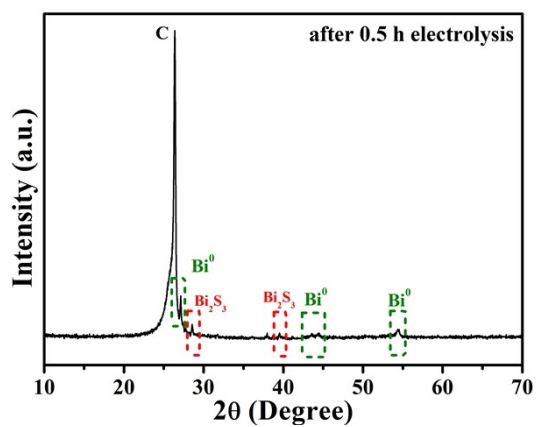

**Fig. S18.** XRD pattern of the  $\text{Bi}_2\text{S}_3/\text{CNTs}$  catalyst after 0.5 h electrolysis.

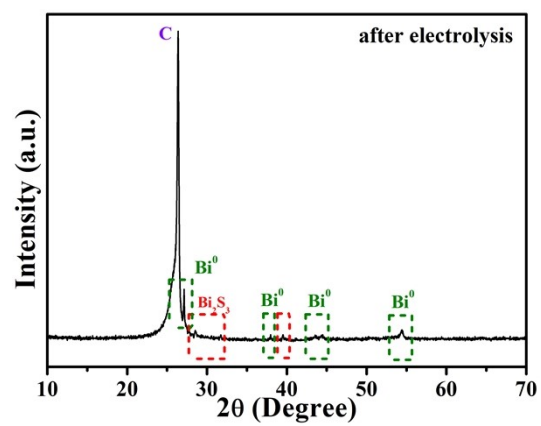

**Fig. S19.** XRD pattern of the Bi<sub>2</sub>S<sub>3</sub>/CNTs catalyst after long-time electrolysis.

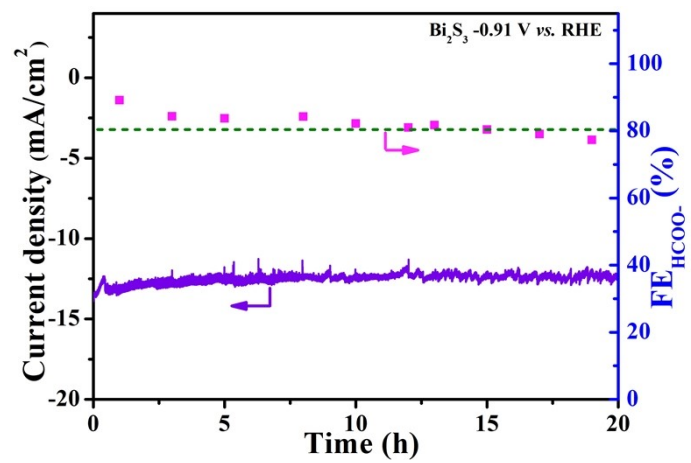

**Fig. S20.** Stability tests of  $\text{Bi}_2\text{S}_3$  at electrolysis potentials of  $-0.91$  V vs. RHE with current density and  $\text{FE}_{\text{HCOO}^-}$  at different times.

**Table S1.** Comparison of the electrocatalytic activity of our catalyst with other state-of-the-art catalysts for electrochemical reduction of CO<sub>2</sub> to HCOO<sup>-</sup> in aqueous media.

| Electrocatalysts                                                    | Potential (V vs. RHE) | Electrolyte                   | FE <sub>HCOO<sup>-</sup></sub> (%) | Reference | j (mA cm <sup>-2</sup> ) |
|---------------------------------------------------------------------|-----------------------|-------------------------------|------------------------------------|-----------|--------------------------|
| <b>This work</b>                                                    | <b>-0.91</b>          | <b>0.5 M KHCO<sub>3</sub></b> | <b>99.3</b>                        |           | <b>-20.36</b>            |
| In <sub>2</sub> S <sub>3</sub> -RGO composite                       | -1.2                  | 0.1 M KHCO <sub>3</sub>       | 91                                 | 6         | -11.50                   |
| Bi-Bi <sub>2</sub> S <sub>3</sub> nanosheets                        | -1.0                  | 0.1 M KHCO <sub>3</sub>       | 85                                 | 7         | 17.00                    |
| SnS <sub>2</sub> Nanosheets                                         | -0.9                  | 0.1 M KHCO <sub>3</sub>       | 93                                 | 8         | -17.58                   |
| Bi <sub>2</sub> S <sub>3</sub> -Bi <sub>2</sub> O <sub>3</sub> @rGO | -0.9                  | 0.1 M KHCO <sub>3</sub>       | 90.1                               | 9         | -4.20                    |
| SnS <sub>2</sub> nanosheets                                         | -0.9                  | 0.5 M KHCO <sub>3</sub>       | 83.2                               | 10        | -24.10                   |
| Bi <sub>2</sub> S <sub>3</sub> -Bi <sub>2</sub> O <sub>3</sub> NSs  | -1.1                  | 0.1 M KHCO <sub>3</sub>       | 93.8                               | 11        | -18.23                   |
| Sn/SnS <sub>2</sub> nanosheets                                      | -0.88                 | 0.5 M NaHCO <sub>3</sub>      | 84.5                               | 12        | -13.90                   |
| Bi-Bi <sub>2</sub> S <sub>3</sub>                                   | -0.87                 | 0.5 M NaHCO <sub>3</sub>      | 84.0                               | 13        | -6.25                    |
| CuS/Cu                                                              | -0.9                  | 0.1 M KHCO <sub>3</sub>       | 75                                 | 14        | -9.00                    |
| PbS                                                                 | -1.2                  | 0.1 M KHCO <sub>3</sub>       | 97.6                               | 15        | -                        |
| S,O-doped Bi nanorods                                               | -1.09                 | 0.1 M KHCO <sub>3</sub>       | 89.4                               | 16        | 13.09                    |

## References

1. G. Kresse, Furthmüller, *J. Comp Mater Sci.*, 1996, **6**, 15.
2. P.E. Blöchl, *Phys. Rev. B*, 1994, **50**, 17953.
3. J.P. Perdew, J.A. Chevary, S.H. Vosko, K.A. Jackson, M.R. Pederson, D.J. Singh, C. Fiolhais, *Phys. Rev. B*, 1992, **46**, 6671.
4. S. Grimme, J. Antony, S. Ehrlich, H. Krieg, *J. Chem. Phys.* 2010, **132**, 154104.
5. E. Skulason, T. Bligaard, S. Gudmundsdottir, F. Studt, J. Rossmeisl, F. Abild-Pedersen, T. Vegge, H. Jonsson, J.K. Nørskov, *Phys. Chem. Chem. Phys.*, 2012, **14**, 1235.
6. H. Ning, X. Fei, Z.H. Tan, W.H. Wang, Z.X. Yang, M.B. Wu, *ACS Appl. Nano Mater.* 2022, **5**, 2335-2342.
7. X.L. Shao, Y.Y. Liu, *J. Electrochem. Soc.*, 2022, **169**, 026505.
8. A. Zhang, Y.X. Liang, H.P. Li, S.L. Wang, Q.X. Chang, K.Y. Peng, Z.G. Geng, J. Zeng, *Nano Lett.*, 2021, **21**, 7789-7795.
9. X.X. Yang, P.L. Deng, D.Y. Liu, S. Zhao, D. Li, H. Wu, Y.M. Ma, B.Y. Xia, M.T. Li, C.H. Xiao, S.J. Ding, *J. Mater. Chem. A*, 2020, **8**, 2472-2480.
10. W. Zhang, W.K. Zhu, T. Yao, *Nano Micro Lett.*, 2021, **3**, 189.
11. P.F. Sui, C.Y. Xu, M.N. Zhu, S.B. Liu, Q.X. Liu, J.L. Luo, *Small*, 2022, **18**, 2105682.
12. F.W. Li, L. Chen, M.Q. Xue, T. Williams, Y. Zhang, D.R. MacFarlane, J. Zhang, *Nano Energy*, 2017, **31**, 270-277.
13. Y. Zhang, F.W. Li, X.L. Zhang, T. Williams, C.D. Easton, A.M. Bond, J. Zhang, *J. Mater. Chem. A*, 2018, **6**, 4714-4720.

14. Y. Deng, Y. Huang, D. Ren, A.D. Handoko, Z.W. Seh, P. Hirunsit, B.S. Yeo, *ACS Appl. Mater. Inter.*, 2018, **10**, 28572-28581.
15. J.W. Lim, W.J. Dong, J.Y. Park, D.M. Hong, J.L. Lee, *ACS Appl. Mater. Inter.*, 2020, **12**, 22891-22900.
16. X.L. Shao, X.L. Sun, Q. Huang, J. Yi, J.J. Zhang, Y.Y. Liu, *Dalton Trans.*, 2022, **51**, 7223-7233.
